# Supplementary material
Source: Springer Nature journal article supplement (https://www.springermedizin.de/resource/supplementary/12245_2013_175_MOESM1_ESM.pdf/9672928)

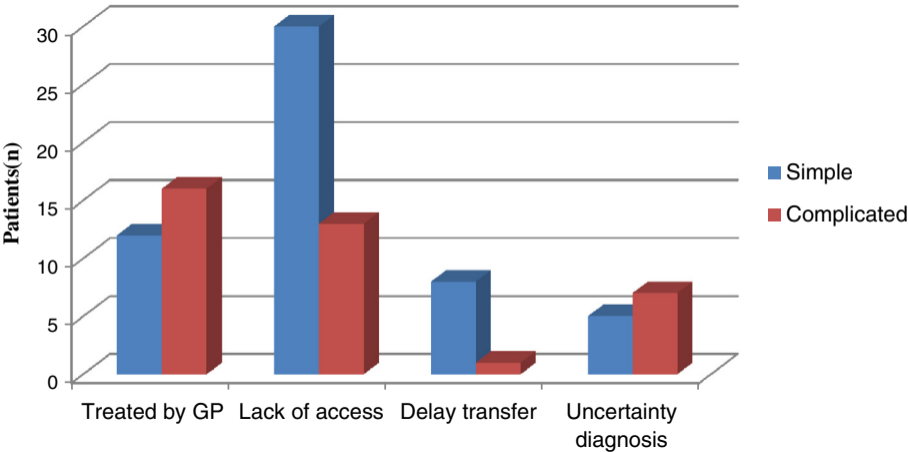

Supplement: MOESM1 [file 9672928]
